# Supplementary material for: OsWRKY114 Is a Player in Rice Immunity against Fusarium fujikuroi
Source: MDPI journal article supplement (doi:10.3390/ijms24076604), 2023-04-01
Supplement: s1 [file s1]

| Gene                        | Locus number | Primer sequence                                         | Purpose            |
|-----------------------------|--------------|---------------------------------------------------------|--------------------|
| <i>OsWRKY114</i>            | Os12g02400   | F: CACCCATGTTCCAAGTGACA<br>R: ATCGTCAGGGTGACCATTG       | qRT-PCR<br>qRT-PCR |
| <i>OsGID1</i>               | Os05g33730   | F: CGGACGGGACGTTCGAG<br>R: TATGATCACCGGAACGGCT          | qRT-PCR<br>qRT-PCR |
| <i>OsXTH8</i>               | Os08g13920   | F: TACAGCACCAACGCGTGCGT<br>R: GTAGGACATGTAGTTGCGCTCGGCC | qRT-PCR<br>qRT-PCR |
| <i>OsGA20<sub>ox</sub>2</i> | Os01g66100   | F: GACTACTTCTTCAGCACC<br>R: CTTTCATCTCCTCGCAGTA         | qRT-PCR<br>qRT-PCR |
| <i>OsGA3<sub>ox</sub>1</i>  | Os05g08540   | F: GCTGTAAGGGATAAGTTGTT<br>R: ACTCTCCTTGTCCTCTTC        | qRT-PCR<br>qRT-PCR |
| <i>OsMYC2</i>               | Os10g42430   | F: TGGAGATCGAGGCCAAGATC<br>R: TCTACTCGCAGGACCAGCTCAA    | qRT-PCR<br>qRT-PCR |
| <i>OsAOC</i>                | Os03g32314   | F: CTCAACCAGATCGTCTTCCC<br>R: GAAGTTGTTGAGGCAGGCGT      | qRT-PCR<br>qRT-PCR |
| <i>OsJAZ5</i>               | Os04g55130   | F: TGTGTGCTTCACAGTATTTG<br>R: GGACAGAAGCAGCTCCAATG      | qRT-PCR<br>qRT-PCR |
| <i>OsJAZ9</i>               | Os03g08310   | F: CGTCTGCGATTTGAGAATTG<br>R: ATGCGACGAGAACCATCTTC      | qRT-PCR<br>qRT-PCR |
| <i>OsJAZ14</i>              | Os10g25250   | F: CGATTCAAGGCCAATTTACTG<br>R: AACAAGACGATTTGCGCAAC     | qRT-PCR<br>qRT-PCR |
| <i>OsActin</i>              | Os03g50885   | F: CATTGGTGCTGAGCGTTTCC<br>R: CTCCTTGCTCATCCTGTCAGC     | qRT-PCR<br>qRT-PCR |

**Supplementary Table S1.** Sequence of primers used in this study.
